# Supplementary material for: Measurement report: Secondary organic aerosols at a forested mountain site in southeastern China
Source: Copernicus journal article supplement (doi:10.5194/egusphere-2023-2684), 2023-12-12
Supplement: Supplementary file 1 [file egusphere-2023-2684-supplement.pdf]

## Supplementary Information

### Measurement report: Secondary organic aerosols at a forested mountain site in southeastern China

Zijun Zhang<sup>1,2</sup>, Weiqi Xu<sup>1,\*</sup>, Yi Zhang<sup>1,2</sup>, Wei Zhou<sup>1</sup>, Xiangyu Xu<sup>1,2</sup>, Aodong Du<sup>1,2</sup>, Yinzhou Zhang<sup>1</sup>, Hongqin Qiao<sup>3</sup>, Ye Kuang<sup>3</sup>, Xiaole Pan<sup>1</sup>, Zifa Wang<sup>1,2</sup>, Xueling Cheng<sup>1</sup>, Lanzhong Liu<sup>4</sup>, Qingyan Fu<sup>5</sup>, Douglas R. Worsnop<sup>6</sup>, Jie Li<sup>1</sup>, Yele Sun<sup>1,2,\*</sup>

<sup>1</sup>State Key Laboratory of Atmospheric Boundary Layer Physics and Atmospheric Chemistry, Institute of Atmospheric Physics, Chinese Academy of Sciences, Beijing 100029, China

<sup>2</sup>College of Earth and Planetary Sciences, University of Chinese Academy of Sciences, Beijing 100049, China

<sup>3</sup>Institute for Environmental and Climate Research, Jinan University, Guangzhou 511143, China

<sup>4</sup>Shanghuang Atmospheric Boundary Layer and Eco-Environment Observatory, Institute of Atmospheric Physics, Chinese Academy of Sciences, Jinhua 321203, China

<sup>5</sup>Shanghai Environmental Monitoring Center, Shanghai 200235, China

<sup>6</sup>Aerodyne Research Inc., Billerica, Massachusetts 01821, United States

*Correspondence to:* Weiqi Xu ([xuweiqi@mail.iap.ac.cn](mailto:xuweiqi@mail.iap.ac.cn)), Yele Sun ([sunyele@mail.iap.ac.cn](mailto:sunyele@mail.iap.ac.cn))

**Table S1.** Summary of mean mass concentrations (in  $\mu\text{g m}^{-3}$ ) and chemical composition of submicron aerosols measured at selected mountain sites in China.

| <b>Location</b>          | <b>Mt. Wuzhi</b>        | <b>Mt. Tai</b>       | <b>Mt. Yulong</b>       | <b>Mt. Daban</b>        | <b>Mt. Waliguan</b>    |        |
|--------------------------|-------------------------|----------------------|-------------------------|-------------------------|------------------------|--------|
| <b>Time</b>              | 3/19/2015–<br>4/15/2015 | 2011                 | 3/22/2015–<br>4/14/2015 | 9/5/2013–<br>10/15/2013 | 7/1/2017–<br>7/31/2017 |        |
| <b>Org</b>               | Mass                    | 4.8                  | 11.2                    | 3.9                     | 4.9                    | 3.5    |
|                          | Frac.                   | 43.8 %               | 32.6 %                  | 68 %                    | 43.2 %                 | 38.1 % |
| <b>SO<sub>4</sub></b>    | Mass                    | 3.4                  | 9.2                     | 0.8                     | 3.2                    | 3.1    |
|                          | Frac.                   | 30.9 %               | 26.7 %                  | 14 %                    | 28.2 %                 | 34.5 % |
| <b>NO<sub>3</sub></b>    | Mass                    | 0.5                  | 7.2                     | 0.2                     | 1.2                    | 0.7    |
|                          | Frac.                   | 4.7 %                | 20.9 %                  | 4 %                     | 10.6 %                 | 8.1 %  |
| <b>NH<sub>4</sub></b>    | Mass                    | 1.5                  | 5.8                     | 0.3                     | 1.4                    | 1.4    |
|                          | Frac.                   | 13.7 %               | 16.9 %                  | 5 %                     | 12.3 %                 | 15.2 % |
| <b>Chl</b>               | Mass                    | 0.03                 | 0.95                    |                         | 0.14                   | 0.1    |
|                          | Frac.                   | 0.3 %                | 2.8 %                   |                         | 1.2 %                  | 1.1 %  |
| <b>BC</b>                | Mass                    | 0.7                  |                         | 0.5                     | 0.51                   | 0.3    |
|                          | Frac.                   | 6.6 %                |                         | 9 %                     | 4.5 %                  | 3.0 %  |
| <b>NR-PM<sub>1</sub></b> | 10.2                    | 34.4                 | 5.2                     | 10.9                    | 8.8                    |        |
| <b>PM<sub>1</sub></b>    | 10.9                    |                      | 5.7                     | 11.4                    | 9.1                    |        |
| <b>References</b>        | (Zhu et al., 2016)      | (Zhang et al., 2014) | (Zheng et al., 2017)    | (Du et al., 2015)       | (Zhang et al., 2019)   |        |

**Table S2.** Summary of main PM<sub>1</sub> chemical components, air pollutants, and meteorological parameters (average  $\pm$  standard deviation) during different periods.

| <b>Species</b>                                  |                                            | <b>Entire study</b> | <b>P1</b>         | <b>P2</b>         |
|-------------------------------------------------|--------------------------------------------|---------------------|-------------------|-------------------|
|                                                 | PM <sub>1</sub>                            | 4.45 $\pm$ 6.51     | 1.34 $\pm$ 0.83   | 9.39 $\pm$ 5.57   |
|                                                 | Org                                        | 2.01 $\pm$ 2.82     | 0.74 $\pm$ 0.48   | 4.22 $\pm$ 2.54   |
|                                                 | NO <sub>3</sub>                            | 1.02 $\pm$ 2.38     | 0.13 $\pm$ 0.20   | 1.74 $\pm$ 1.51   |
| <b><i>PM<sub>1</sub> species</i></b>            | SO <sub>4</sub>                            | 0.54 $\pm$ 0.89     | 0.09 $\pm$ 0.10   | 1.54 $\pm$ 0.93   |
| <b><i>(<math>\mu\text{g m}^{-3}</math>)</i></b> | NH <sub>4</sub>                            | 0.83 $\pm$ 2.60     | 0.12 $\pm$ 0.10   | 1.01 $\pm$ 0.66   |
|                                                 | Chl                                        | 0.05 $\pm$ 0.20     | 0.01 $\pm$ 0.02   | 0.06 $\pm$ 0.05   |
|                                                 | BC                                         | 0.44 $\pm$ 0.36     | 0.25 $\pm$ 0.14   | 0.82 $\pm$ 0.47   |
|                                                 | O <sub>3</sub>                             | 13.70 $\pm$ 12.42   | 4.80 $\pm$ 4.73   | 15.0 $\pm$ 7.15   |
|                                                 | NO                                         | 0.55 $\pm$ 0.95     | 0.78 $\pm$ 1.62   | 0.32 $\pm$ 0.09   |
| <b><i>Air pollutants</i></b>                    | NO <sub>2</sub>                            | 3.45 $\pm$ 3.33     | 5.00 $\pm$ 4.88   | 2.20 $\pm$ 1.03   |
| <b><i>(ppbv)</i></b>                            | CO (ppmv)                                  | 0.26 $\pm$ 0.12     | 0.36 $\pm$ 0.09   | 0.26 $\pm$ 0.07   |
|                                                 | PM <sub>2.5</sub> ( $\mu\text{g m}^{-3}$ ) | 6.74 $\pm$ 7.11     | 2.08 $\pm$ 1.67   | 15.27 $\pm$ 9.03  |
|                                                 | PM <sub>10</sub> ( $\mu\text{g m}^{-3}$ )  | 15.78 $\pm$ 13.23   | NA                | 21.19 $\pm$ 12.83 |
|                                                 | <i>T</i> ( $^{\circ}\text{C}$ )            | 13.03 $\pm$ 6.13    | 11.58 $\pm$ 1.92  | 11.93 $\pm$ 1.64  |
| <b><i>Meteorological</i></b>                    | RH (%)                                     | 86.98 $\pm$ 16.60   | 100 $\pm$ 0       | 93.90 $\pm$ 8.11  |
| <b><i>parameters</i></b>                        | WS ( $\text{m s}^{-1}$ )                   | 2.42 $\pm$ 1.24     | 2.17 $\pm$ 1.51   | 3.24 $\pm$ 1.83   |
|                                                 | <i>P</i> (hPa)                             | 894.28 $\pm$ 3.21   | 894.43 $\pm$ 1.20 | 893.29 $\pm$ 1.07 |

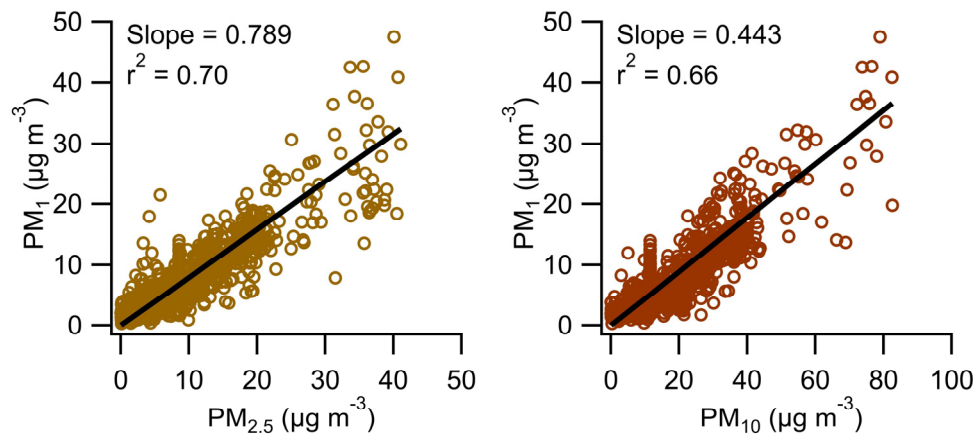

**Figure S1.** Scatter plots of mass concentrations of  $PM_1$  vs.  $PM_{2.5}$  and  $PM_{10}$ .

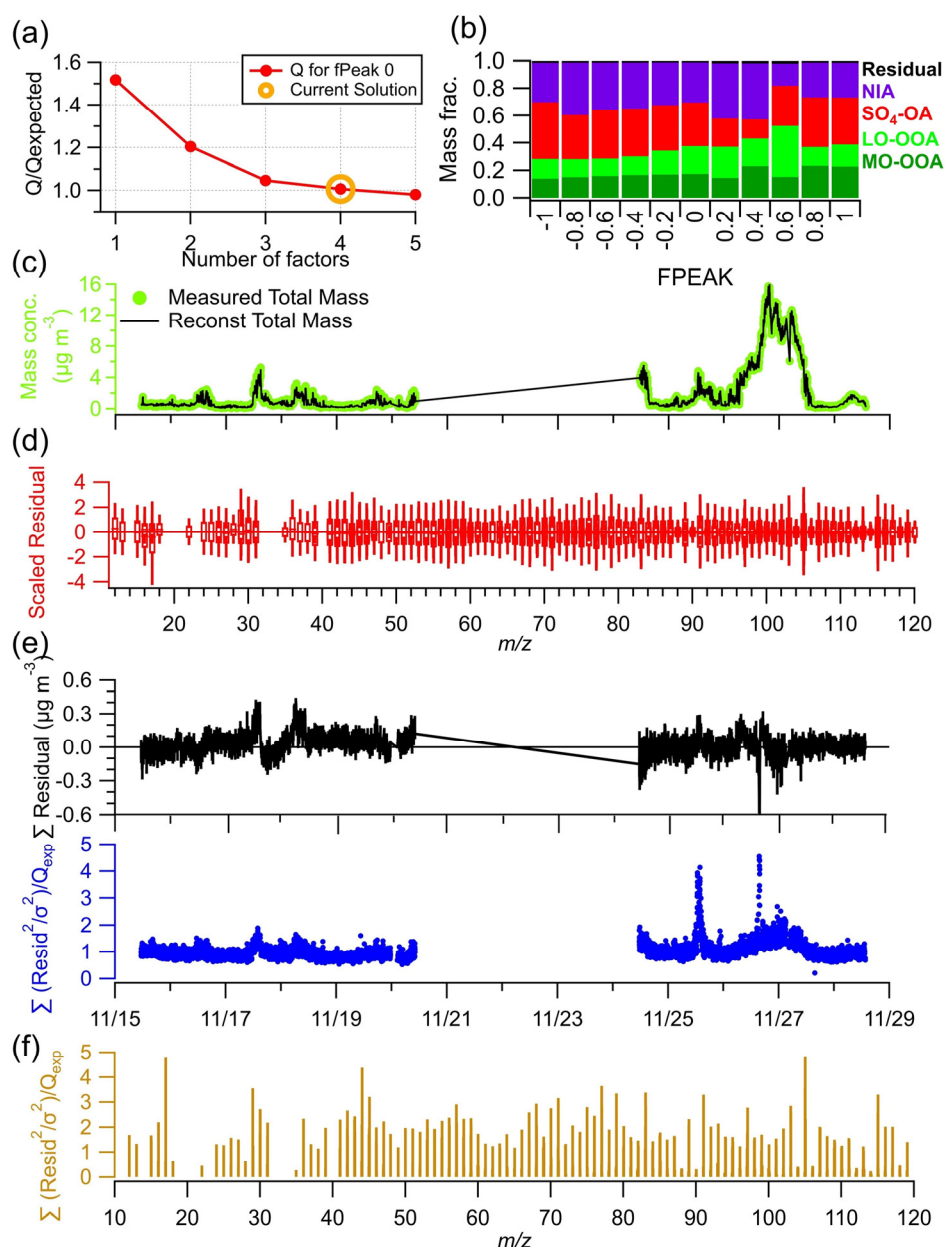

**Figure S2.** Scatter plots of mass concentrations of  $\text{PM}_{10}$  vs.  $\text{PM}_{2.5}$  and  $\text{PM}_{10}$ . PMF key diagnostic plots: (a)  $Q/Q_{\text{expected}}$  vs. PMF factors at  $f_{\text{Peak}} = 0$ ; (b) mass fraction of PMF factors vs.  $f_{\text{Peak}}$ ; (c) time series of the reconstructed and measured total organic mass; (d) scaled residual for each mass; (e) time series of the residual of PMF solutions and  $Q/Q_{\text{expected}}$ ; (f) the  $Q/Q_{\text{expected}}$  for each mass.

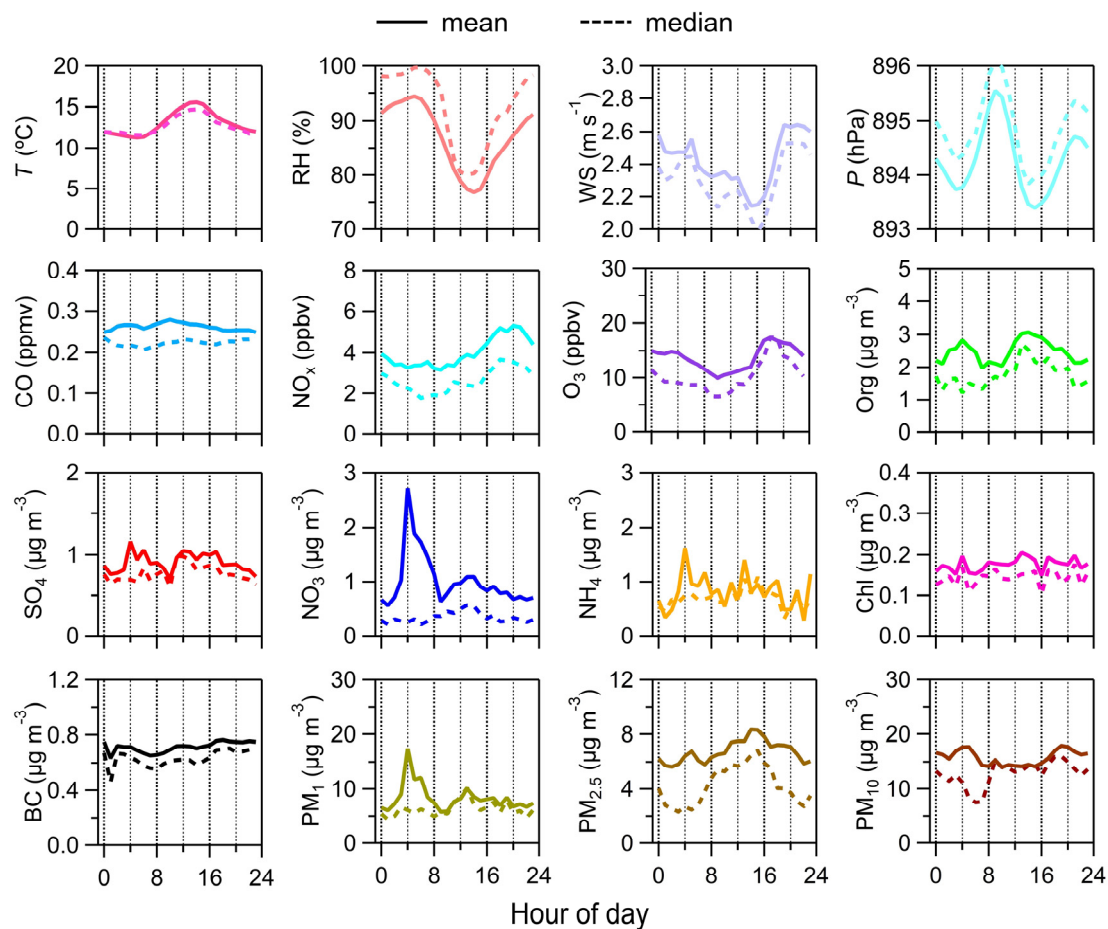

**Figure S3.** Diurnal variations of PM<sub>1</sub> species, air pollutants, and meteorological parameters during the entire campaign.

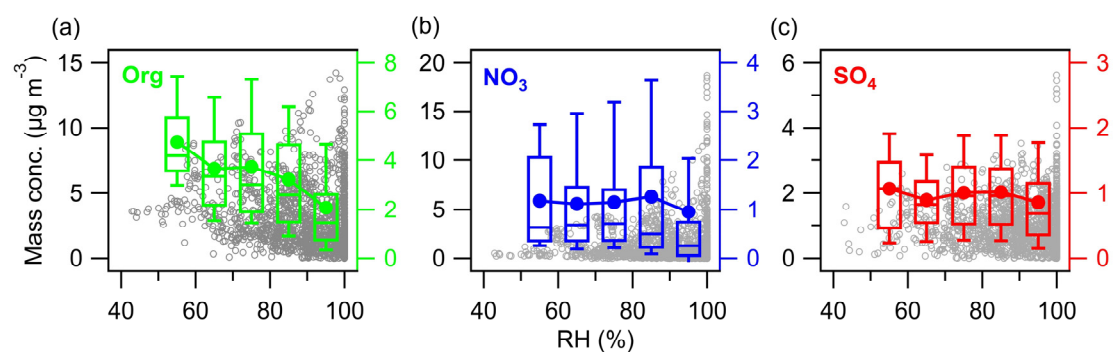

**Figure S4.** Variations of organics, nitrate, and sulfate mass concentrations as a function of RH during the entire campaign. The data points are grouped in RH bins (10 % increment).

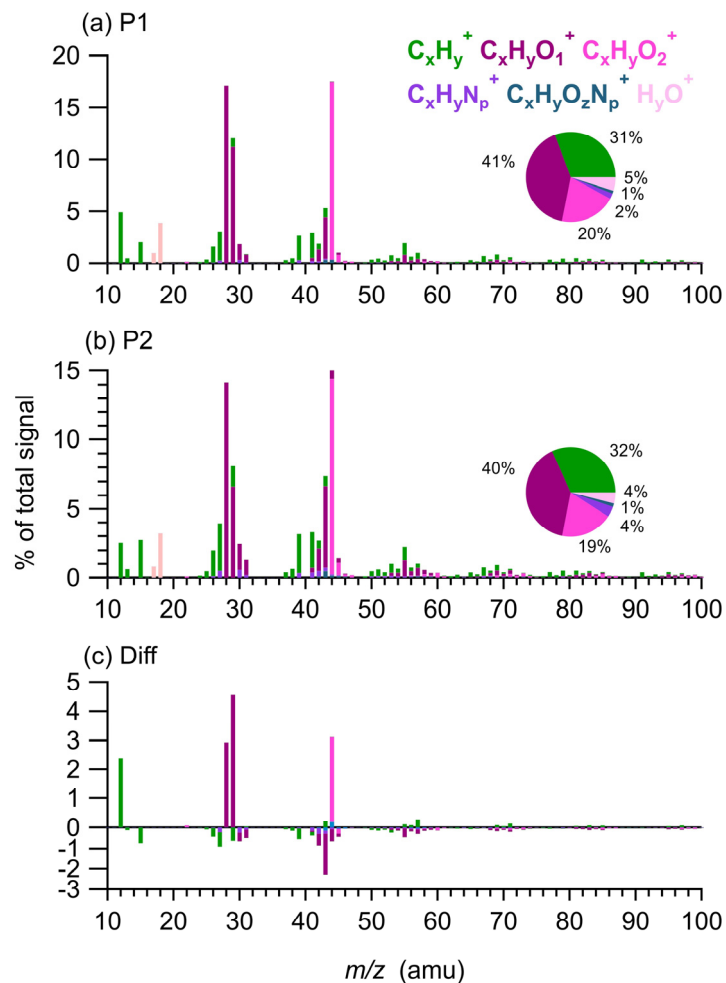

**Figure S5.** The average high-resolution mass spectra of OA sampled at SH site colored by six ion categories during (a) P1 and (b) P2, as well as (c) the difference in these two mass spectra.

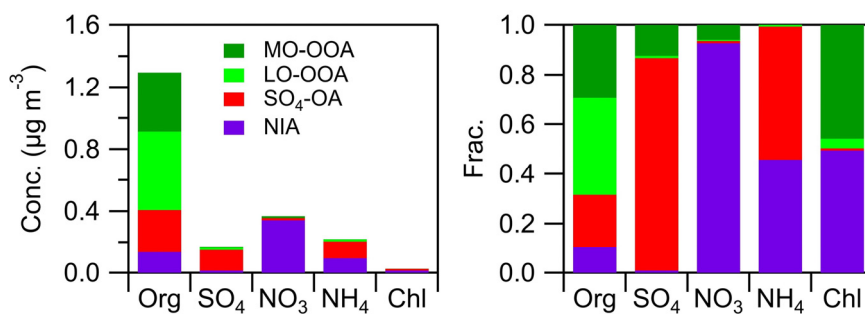

**Figure S6.** Mass concentrations and mass fractions of NR-PM<sub>1</sub> species in four PMF factors.

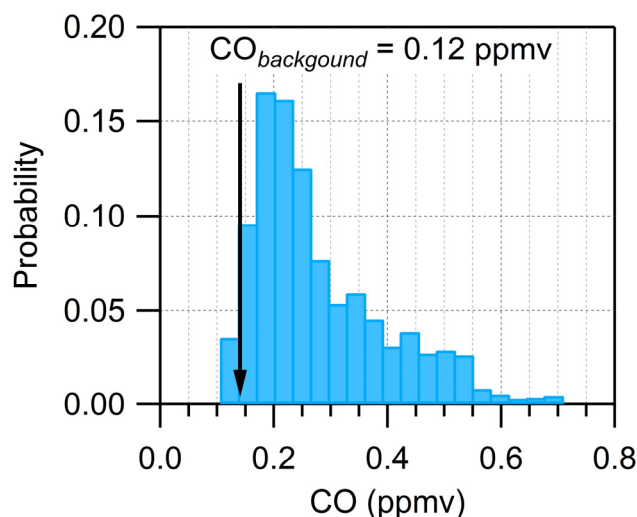

**Figure S7.** Probability distribution of the mixing ratio of CO during the entire campaign.

## References

- Du, W., Sun, Y.L., Xu, Y.S., Jiang, Q., Wang, Q.Q., Yang, W., Wang, F., Bai, Z.P., Zhao, X.D., Yang, Y.C.: Chemical characterization of submicron aerosol and particle growth events at a national background site (3295 m a.s.l.) on the Tibetan Plateau. *Atmos. Chem. Phys.* 15, 10811-10824, DOI: 10.5194/acp-15-10811-2015, 2015.
- Zhang, Y.M., Zhang, X.Y., Sun, J.Y., Hu, G.Y., Shen, X.J., Wang, Y.Q., Wang, T.T., Wang, D.Z., Zhao, Y.: Chemical composition and mass size distribution of PM<sub>1</sub> at an elevated site in central east China. *Atmos. Chem. Phys.* 14, 12237-12249, DOI: 10.5194/acp-14-12237-2014, 2014.
- Zhu, Q., He, L.Y., Huang, X.F., Cao, L.M., Gong, Z.H., Wang, C., Zhuang, X., Hu, M.: Atmospheric aerosol compositions and sources at two national background sites in northern and southern China. *Atmos. Chem. Phys.* 16, 10283-10297, DOI: 10.5194/acp-16-10283-2016, 2016
- Zhang, X., Xu, J., Kang, S., Zhang, Q., Sun, J.: Chemical characterization and sources of submicron aerosols in the northeastern Qinghai–Tibet Plateau: insights from high-resolution mass spectrometry. *Atmos. Chem. Phys.* 19, 7897-7911, DOI: 10.5194/acp-19-7897-2019, 2019.
- Zheng, J., Hu, M., Du, Z., Shang, D., Gong, Z., Qin, Y., Fang, J., Gu, F., Li, M., Peng, J., Li, J., Zhang, Y., Huang, X., He, L., Wu, Y., Guo, S.: Influence of biomass



burning from South Asia at a high-altitude mountain receptor site in China. *Atmos. Chem. Phys.* 17, 6853-6864, DOI: 10.5194/acp-17-6853-2017, 2017.
